# Supplementary material
Source: ML conference proceedings conference paper supplement (https://aclanthology.org/D18-1267)
Supplement: Attachment [file supplementary.pdf › supplementary.pdf]

# Supplementary Material: Sentence Compression for Arbitrary Languages via Multilingual Pivoting

## A Supplemental Material

We provide sample outputs from all domains and languages for our strongest pivot based model, the strongest baseline model and the **Gold** human produced compressions. Where **SP**: single pivot models;  $\mathcal{L}$ : length parameter; **ABS**: sequence-to-sequence model trained on Gigaword; pivot languages: English (**en**), French (**fr**), German (**de**). See Section 4 for a further description of the models.

### A.1 English

| Moss TED                                                                                                                                                                                                                                                                                               |
|--------------------------------------------------------------------------------------------------------------------------------------------------------------------------------------------------------------------------------------------------------------------------------------------------------|
| <b>Source:</b> It was very cold.<br><b>ABS:</b> The cold in the cold of the cold.<br><b>SP<sub><math>\mathcal{L},de</math></sub>:</b> It was cold.<br><b>Gold:</b> It was freezing.                                                                                                                    |
| <b>Source:</b> and the thermometer on the front porch read minus 40 degrees -<br><b>ABS:</b> a guide to the summer<br><b>SP<sub><math>\mathcal{L},de</math></sub>:</b> and thermometers on front read minus 40 -<br><b>Gold:</b> Thermometer in the front reads -40                                    |
| <b>Source:</b> Because I had an early flight to Europe the next morning,<br><b>ABS:</b> Early flight to Europe<br><b>SP<sub><math>\mathcal{L},de</math></sub>:</b> Because I had an early flight to Europe.<br><b>Gold:</b> Because I was flying to Europe the next morning,                           |
| <b>Source:</b> Your physician says, "You know, I think you have some depression.<br><b>ABS:</b> You know about depression<br><b>SP<sub><math>\mathcal{L},de</math></sub>:</b> Your doctor says: I think you have depression.<br><b>Gold:</b> The doctor thinks you have depression.                    |
| <b>Source:</b> So I quickly ran around and tried all the other doors and windows,<br><b>ABS:</b> All the doors open for windows<br><b>SP<sub><math>\mathcal{L},de</math></sub>:</b> So I ran quickly and tried all other doors and windows,<br><b>Gold:</b> I sped round trying every door and window. |

| Moss News                                                                                                                                                                                                                                                                                                                                                                                                                                                                                                                                                                                                   |
|-------------------------------------------------------------------------------------------------------------------------------------------------------------------------------------------------------------------------------------------------------------------------------------------------------------------------------------------------------------------------------------------------------------------------------------------------------------------------------------------------------------------------------------------------------------------------------------------------------------|
| <b>Source:</b> The reaction of the European parliament and, I hope, of the European union, will be clear.<br><b>ABS:</b> EU parliament's reaction to EU parliament will be clear<br><b>SP<sub><math>\mathcal{L},de</math></sub>:</b> How the European parliament will be clear of the EU<br><b>Gold:</b> I hope that the European union will be clear.                                                                                                                                                                                                                                                      |
| <b>Source:</b> It offers a vital opportunity for the leaders of both the industrialised world and the emerging economies to work together on a common agenda for immediate economic stability and longer-term recovery.<br><b>ABS:</b> Emerging economies to work together on economic stability.<br><b>SP<sub><math>\mathcal{L},de</math></sub>:</b> Emerging economies offer vital opportunity for emerging economies to work together on economic stability and recovery efforts.<br><b>Gold:</b> It is an important opportunity for the leaders of the industrialised countries and emerging economies. |
| <b>Source:</b> We have reiterated the most important principles in our report which should underscore our foreign policy.<br><b>ABS:</b> The most important principles of foreign policy.<br><b>SP<sub><math>\mathcal{L},de</math></sub>:</b> A look at the world's foreign policy.<br><b>Gold:</b> Our report reaffirms our foreign policy principles.                                                                                                                                                                                                                                                     |
| <b>Source:</b> The prime minister will make a statement to the european parliament on the preparations for next week's G20 summit .<br><b>ABS:</b> prime minister to make statement to european parliament on preparations for summit<br><b>SP<sub><math>\mathcal{L},de</math></sub>:</b> Prime minister to make statement on preparations for next european parliament.<br><b>Gold:</b> The prime minister will make a statement next week.                                                                                                                                                                |

| <b>Moss EUPar</b>                                                                                                                                                                                                                                                                                                                                                                                                                                                                                                |
|------------------------------------------------------------------------------------------------------------------------------------------------------------------------------------------------------------------------------------------------------------------------------------------------------------------------------------------------------------------------------------------------------------------------------------------------------------------------------------------------------------------|
| <p><b>Source:</b> Mr President, I believe that the level of interest in this matter far outweighs the crowd of people that have hurried.</p> <p><b>ABS:</b> It's time for President</p> <p><b>SP<sub>L,de</sub>:</b> Mr President, I believe that interest in this matter far exceeds the crowds of people in this House this afternoon.</p> <p><b>Gold:</b> Mr. President, the level of interest in this matter outweighs the crowd of people who hurried into the Chamber, which I regret for both groups.</p> |
| <p><b>Source:</b> Mr President, Guinea-Conakry needs the support of the international community.</p> <p><b>ABS:</b> President calls for international community to support international community</p> <p><b>SP<sub>L,de</sub>:</b> Mr President, Guinea needs international support.</p> <p><b>Gold:</b> They need international support, Mr President.</p>                                                                                                                                                     |
| <p><b>Source:</b> Following the death of President Conté, a military junta seized power.</p> <p><b>ABS:</b> Military junta seizes power in ivory coast.</p> <p><b>SP<sub>L,de</sub>:</b> A military junta took power.</p> <p><b>Gold:</b> A military junta seized power.</p>                                                                                                                                                                                                                                     |
| <p><b>Source:</b> Indeed, I believe that the Union's foreign policy is worthy of attention.</p> <p><b>ABS:</b> The union's foreign policy.</p> <p><b>SP<sub>L,de</sub>:</b> I think Union foreign policy deserves attention.</p> <p><b>Gold:</b> Unions foreign policy is worth attention</p>                                                                                                                                                                                                                    |

| <b>Moss Books</b>                                                                                                                                                                                                                                                                                                                                                                                                                                      |
|--------------------------------------------------------------------------------------------------------------------------------------------------------------------------------------------------------------------------------------------------------------------------------------------------------------------------------------------------------------------------------------------------------------------------------------------------------|
| <p><b>Source:</b> The establishment of Europol was agreed in the Maastricht Treaty on European Union of 7 February 1992.</p> <p><b>ABS:</b> Europol agrees in Maastricht Treaty on 1992.</p> <p><b>SP<sub>L,de</sub>:</b> The Maastricht Treaty was agreed on 7 February 1992.</p> <p><b>Gold:</b> The establishment of Europol was agreed in the Maastricht Treaty on European Union of 02/07/1992.</p>                                               |
| <p><b>Source:</b> We assist partner countries in developing quality education and training systems and in putting them into practice.</p> <p><b>ABS:</b> Helping partner countries in developing quality education.</p> <p><b>SP<sub>L,de</sub>:</b> We support partner countries in developing quality and training systems.</p> <p><b>Gold:</b> We assist partner countries in developing quality education and training and implementing these.</p> |
| <p><b>Source:</b> We work on behalf of the European Union institutions, particularly the European Commission.</p> <p><b>ABS:</b> The EU commission on behalf of EU institutions.</p> <p><b>SP<sub>L,de</sub>:</b> We work on behalf of the European Commission.</p> <p><b>Gold:</b> We work with European union institutions, even the European Commission.</p>                                                                                        |

| <b>DUC-2004</b>                                                                                                                                                                                                                                                                                                                                                                                                   |
|-------------------------------------------------------------------------------------------------------------------------------------------------------------------------------------------------------------------------------------------------------------------------------------------------------------------------------------------------------------------------------------------------------------------|
| <p><b>Source:</b> King Norodom Sihanouk has declined requests to chair a summit of Cambodia's top political leaders, saying the meeting would not bring any progress in deadlocked negotiations to form a government.</p> <p><b>SP<sub>L,de</sub>:</b> King Norodom Sihanouk has refused to chair Cambodia summit.</p> <p><b>Gold:</b> Sihanouk refuses to chair Cambodian political summit at home or abroad</p> |
| <p><b>Source:</b> Cambodia's ruling party responded Tuesday to criticisms of its leader in the U.S. Congress with a lengthy defense of strongman Hun Sen's human rights record.</p> <p><b>SP<sub>L,de</sub>:</b> Cambodia's ruling party responded Tuesday to criticism of its leader in the US.</p> <p><b>Gold:</b> Cambodian party defends leader Hun Sen against criticism of U.S. House</p>                   |

| <b>DUC-2004</b>                                                                                                                                                                                                                                                                                                                                                                                                |
|----------------------------------------------------------------------------------------------------------------------------------------------------------------------------------------------------------------------------------------------------------------------------------------------------------------------------------------------------------------------------------------------------------------|
| <p><b>Source:</b> The Swiss government has ordered no investigation of possible bank accounts belonging to former Chilean dictator Augusto Pinochet, a spokesman said Wednesday.</p> <p><b>SP<sub>L,de</sub>:</b> Swiss government ordered no inquiry into possible bank accounts of former Chilean dictator Augusto.</p> <p><b>Gold:</b> Switzerland joins charges against Pinochet but avoids bank probe</p> |
| <p><b>Source:</b> Britain has defended its arrest of Gen. Augusto Pinochet, with one lawmaker saying that Chile's claim that the former Chilean dictator has diplomatic immunity is ridiculous.</p> <p><b>SP<sub>L,de</sub>:</b> Britain has defended its arrest of Augusto Pinochet: Chile claims absurd.</p> <p><b>Gold:</b> Britain defends, Chile condemns, arrest of Pinochet in London</p>               |

## A.2 German

| Moss TED                                                                                                                                                                                                                                                                                                                                                                                                                                                                                                                                                  |
|-----------------------------------------------------------------------------------------------------------------------------------------------------------------------------------------------------------------------------------------------------------------------------------------------------------------------------------------------------------------------------------------------------------------------------------------------------------------------------------------------------------------------------------------------------------|
| <p><b>Source:</b> Die Bedrohung hat einen merkwürdigen Ursprung: das organisierte Verbrechen.</p> <p><b>ABS<sub>en</sub>:</b> Organisierte Kriminalität ist eine Bedrohung für das organisierte Verbrechen.</p> <p><b>SP<sub>L,en</sub>:</b> Diese Bedrohung beruht auf organisierten Verbrechen.</p> <p><b>Gold:</b> Die Bedrohung hat einen Ursprung: das organisierte Verbrechen.</p>                                                                                                                                                                  |
| <p><b>Source:</b> Das organisierte Verbrechen ist stets auf der Suche nach solchen Möglichkeiten und wird immer wieder fündig.</p> <p><b>ABS<sub>en</sub>:</b> Das organisierte Verbrechen der Kriminalität</p> <p><b>SP<sub>L,en</sub>:</b> Organisierte Kriminalität sucht solche Möglichkeiten immer noch immer wieder.</p> <p><b>Gold:</b> Das organisierte Verbrechen ist sucht stets nach solchen Möglichkeiten und wird immer wieder fündig.</p>                                                                                                   |
| <p><b>Source:</b> Aber die meisten Menschen sehen die Dinge anders.</p> <p><b>ABS<sub>en</sub>:</b> Die meisten Menschen sehen Dinge anders, aber die meisten Menschen sehen sich anders.</p> <p><b>SP<sub>L,en</sub>:</b> Die meisten sehen anders.</p> <p><b>Gold:</b> Menschen sind intressenlos.</p>                                                                                                                                                                                                                                                  |
| <p><b>Source:</b> Die Desillusionierung mit der Politik und den Politikern ist ebenfalls ein Schlüsselement unserer Sehnsucht nach vom Schicksal begünstigten Führern.</p> <p><b>ABS<sub>en</sub>:</b> Politische Parteien in der Nähe der Politik</p> <p><b>SP<sub>L,en</sub>:</b> Die Enttäuschung über Politik und Politik ist auch ein Schlüsselement unserer langjährigen Machthaber.</p> <p><b>Gold:</b> Die Desillusionierung der Politik und den Politikern ist ein Schlüsselement unserer Sehnsucht nach vom Schicksal begünstigten Führern.</p> |

| Moss News                                                                                                                                                                                                                                 |
|-------------------------------------------------------------------------------------------------------------------------------------------------------------------------------------------------------------------------------------------|
| <p><b>Source:</b> Dass es mir wirklich egal war, ob mich</p> <p><b>ABS<sub>en</sub>:</b> Es ist Zeit für mich.</p> <p><b>SP<sub>L,en</sub>:</b> Dass mir wirklich egal war</p> <p><b>Gold:</b> Dass es mir wirklich egal war, ob mich</p> |
| <p><b>Source:</b> Zwischen dem Griff nach den Sternen</p> <p><b>ABS<sub>en</sub>:</b> Es ist Zeit für mich.</p> <p><b>SP<sub>L,en</sub>:</b> Zwischen den Sternen</p> <p><b>Gold:</b> Zwischen dem Griff nach den Sternen</p>             |
| <p><b>Source:</b> Brach ich in mein eigenes Haus ein.</p> <p><b>ABS<sub>en</sub>:</b> Wie man ein eigenes Haus ist.</p> <p><b>SP<sub>L,en</sub>:</b> Ich brach ins Haus.</p> <p><b>Gold:</b> Brach ich in mein Haus ein.</p>              |

| Moss Books                                                                                                                                                                                                                                                                                                                                                                                                                                                                                                                                                                                                                                  |
|---------------------------------------------------------------------------------------------------------------------------------------------------------------------------------------------------------------------------------------------------------------------------------------------------------------------------------------------------------------------------------------------------------------------------------------------------------------------------------------------------------------------------------------------------------------------------------------------------------------------------------------------|
| <p><b>Source:</b> Der Verwaltungsrat setzt sich aus je einem Vertreter der einzelnen EU-Mitgliedstaaten zusammen und hat die Aufgabe, die Aktivitäten von Europol zu kontrollieren.</p> <p><b>ABS<sub>en</sub>:</b> EU will Europol kontrollieren, die Aktivitäten von Europol kontrollieren.</p> <p><b>SP<sub>L,en</sub>:</b> Der Vorstand besteht aus einem Vertreter der einzelnen EU-Mitgliedstaaten und hat die Aufgabe, Europol zu kontrollieren.</p> <p><b>Gold:</b> Der Verwaltungsrat setzt sich je einem Vertreter der einzelnen EU-Mitgliedstaaten zusammen und hat die Aufgabe, die Aktivität von Europol zu kontrollieren.</p> |
| <p><b>Source:</b> Darüber hinaus stärkt er Europa sowohl politisch als auch wirtschaftlich.</p> <p><b>ABS<sub>en</sub>:</b> ein Blick auf Europa, um die Europäische Union zu stärken.</p> <p><b>SP<sub>L,en</sub>:</b> Außerdem stärkt Europa politisch und wirtschaftlich.</p> <p><b>Gold:</b> Darüber hinaus stärkt er Europa politisch und wirtschaftlich.</p>                                                                                                                                                                                                                                                                          |
| <p><b>Source:</b> Die Europäische Union will eine Vorreiterrolle bei der Durchsetzung eines langfristigen Entwicklungsmodells spielen.</p> <p><b>ABS<sub>en</sub>:</b> EU will eine Vorreiterrolle bei der Durchsetzung.</p> <p><b>SP<sub>L,en</sub>:</b> Die Europäische Union will bei der Umsetzung eines langfristigen Entwicklungsmodells.</p> <p><b>Gold:</b> viele Veränderungen zur Verbesserung der Zukunft für Europa dar.</p>                                                                                                                                                                                                    |
| <p><b>Source:</b> Dies ist umso wichtiger, als derzeit alle europäischen Staaten über den wirtschaftlichen Aufschwung und die Überwindung der Finanzkrise diskutieren.</p> <p><b>ABS<sub>en</sub>:</b> Europäische Länder suchen Wege zur Überwindung der Finanzkrise.</p> <p><b>SP<sub>L,en</sub>:</b> Umso wichtiger ist jetzt, dass alle europäischen Staaten die wirtschaftliche Erholung und Bewältigung der Finanzkrise diskutieren.</p> <p><b>Gold:</b> Dies ist umso wichtiger, als derzeit alle Staaten über wirtschaftlichen Aufschwung und Überwindung der Finanzkrise diskutieren.</p>                                          |

| Moss EUPar                                                                                                                                                                                                                                                                                                                                                                                                                                                                                                                                                                                                                                          |
|-----------------------------------------------------------------------------------------------------------------------------------------------------------------------------------------------------------------------------------------------------------------------------------------------------------------------------------------------------------------------------------------------------------------------------------------------------------------------------------------------------------------------------------------------------------------------------------------------------------------------------------------------------|
| <p><b>Source:</b> Die Geschwindigkeit, mit der er geholfen hat, die G20 als neues Instrument einer internationalen wirtschaftlichen Governance zu entwickeln, ist sowohl ermutigend als auch beeindruckend.</p> <p><b>ABS<sub>en</sub>:</b> G20 begrüßt neues instrument für die entwicklung der G20.</p> <p><b>SP<sub>L,en</sub>:</b> Die Geschwindigkeit, mit der er die G20 als neues Instrument der internationalen Wirtschaftsregierung entwickelt.</p> <p><b>Gold:</b> Die Geschwindigkeit, mit der er half, die G20 als neues Instrument einer internationalen wirtschaftlichen Goverce zu entwickeln, ist ermutigend und beeindruckend.</p> |
| <p><b>Source:</b> Die Minister hatten zu der Sache bereits beim ECOFIN-Frühstück am 15. März eine erste Aussprache.</p> <p><b>ABS<sub>en</sub>:</b> Das frühstück mit den ministern.</p> <p><b>SP<sub>L,en</sub>:</b> Die Minister hatten bereits am 15. März eine erste Aussprache.</p> <p><b>Gold:</b> Minister hatten zum frühstück aussprache.</p>                                                                                                                                                                                                                                                                                              |
| <p><b>Source:</b> Herr Präsident, Guinea-Conakry braucht die Unterstützung der internationalen Völkergemeinschaft.</p> <p><b>ABS<sub>en</sub>:</b> Guinea: böhne braucht internationale unterstützung.</p> <p><b>SP<sub>L,en</sub>:</b> Herr Präsident! Guinea braucht die Unterstützung der internationalen.</p> <p><b>Gold:</b> Guinea braucht internationale unterstützung.</p>                                                                                                                                                                                                                                                                  |
| <p><b>Source:</b> Angesichts dieser Verletzung der zuvor von der Junta zugesagten Verpflichtungen organisierte die Opposition eine Demonstration, die von der Präsidentengarde brutal unterdrückt wurde.</p> <p><b>ABS<sub>en</sub>:</b> Opposition verschiebt Protest angesichts der Zusage der Junta</p> <p><b>SP<sub>L,en</sub>:</b> Die Opposition organisierte eine Demonstration, die vom Präsidentenamt brutal niedergeschlagen worden war.</p> <p><b>Gold:</b> Die Opposition eine Demonstration, die von der Präsidentengarde brutal unterdrückt wurde.</p>                                                                                |

### A.3 French

| Moss EUPar                                                                                                                                                                                                                                                                                                                                                                                                                                                                                                                                                                                                                                                                                                                                                                                                                       |
|----------------------------------------------------------------------------------------------------------------------------------------------------------------------------------------------------------------------------------------------------------------------------------------------------------------------------------------------------------------------------------------------------------------------------------------------------------------------------------------------------------------------------------------------------------------------------------------------------------------------------------------------------------------------------------------------------------------------------------------------------------------------------------------------------------------------------------|
| <p><b>Source:</b> auteure. - Monsieur le Président, je pense que l'intérêt dépasse largement la foule qui s'est précipitée dans cet hémicycle cet après-midi, ce que je regrette une fois de plus pour mon groupe et pour les autres.</p> <p><b>ABS<sub>en</sub>:</b> Au lendemain de la semaine.</p> <p><b>SP<sub>L,en</sub>:</b> Auteur. - Monsieur le Président, je crois qu'il existe un grand intérêt qui va bien au-delà de la foule, précipité dans cette Assemblée cet après-midi.</p> <p><b>Gold:</b> auteure. - Monsieur le Président, je pense que l'intérêt dépasse la foule qui s'est précipitée dans cet hémicycle cet après-midi, ce que je regrette pour mon groupe et pour les autres.</p>                                                                                                                      |
| <p><b>Source:</b> Nous demandons la mise en place d'un gouvernement de transition pour préparer les élections présidentielles et législatives, la junte s'étant définitivement mise au ban de la communauté internationale.</p> <p><b>ABS<sub>en</sub>:</b> Myanmar junte interdit à la communauté internationale.</p> <p><b>SP<sub>L,en</sub>:</b>Nous appelons à la création d'un gouvernement de transition pour la préparation des élections présidentielles et parlementaires avec la junte.</p> <p><b>Gold:</b> Que soit mis en place un gouvernement de transition pour les présidentielles et législatives, la junte étant définitivement au ban de la communauté internationale.</p>                                                                                                                                    |
| <p><b>Source:</b> Il n'y a eu que quelques lignes ici et là, comme s'il n'y avait pas eu des centaines de personnes tuées, des actes terribles de torture et des actes effrayants de viol destinés à annihiler la dignité humaine. Au Moyen-Orient, tout le monde attend l'arrivée d'un nouvel Anouar Sadat dans le monde arabe.</p> <p><b>ABS<sub>en</sub>:</b> Il est temps de sauver des vies humaines dans la dignité humaine.</p> <p><b>SP<sub>L,en</sub>:</b> Il y avait quelques lignes ici et là, des centaines de personnes tuées, des actes de torture et des actes de viol effroyables visant à détruire la dignité humaine.</p> <p><b>Gold:</b> Juste quelques lignes ci et là, comme s'il n'y avait pas eu des centaines de morts, des actes terribles de torture et de viol pour annihiler la dignité humaine.</p> |

| Books MOSS                                                                                                                                                                                                                                                                                                                                                                                                                                                                                                                                                                                       |
|--------------------------------------------------------------------------------------------------------------------------------------------------------------------------------------------------------------------------------------------------------------------------------------------------------------------------------------------------------------------------------------------------------------------------------------------------------------------------------------------------------------------------------------------------------------------------------------------------|
| <p><b>Source:</b> Il repose sur le succès du marché unique et contribue largement à la stabilité économique requise pour une croissance plus intense.</p> <p><b>ABS<sub>en</sub>:</b> La stabilité économique du marché unique</p> <p><b>SP<sub>L,en</sub>:</b> Le succès du marché unique contribue grandement à la stabilité économique nécessaire à la croissance.</p> <p><b>Gold:</b> Reposant sur la marché unique, il contribue largement à la stabilité économique nécessaire à la croissance.</p>                                                                                        |
| <p><b>Source:</b> Il renforce également l'Europe sur les plans politique et économique.</p> <p><b>ABS<sub>en</sub>:</b> L'Europe crise politique crise politique</p> <p><b>SP<sub>L,en</sub>:</b> Elle renforce également politiquement et économiquement l'Europe.</p> <p><b>Gold:</b> l'Europe sur les plans politique et économique.</p>                                                                                                                                                                                                                                                      |
| <p><b>Source:</b> Les nouveaux États membres se sont également engagés à entériner l'UEM et l'euro dans leurs traités d'adhésion. Au Moyen-Orient, tout le monde attend l'arrivée d'un nouvel Anouar Sadat dans le monde arabe.</p> <p><b>ABS<sub>en</sub>:</b> Les nouveaux États membres se sont engagés à soutenir l'« émeu euro »</p> <p><b>SP<sub>L,en</sub>:</b> Les nouveaux États membres s'engagent également à approuver l'UEM et les billets en euros.</p> <p><b>Gold:</b> Les États membres se sont également engagés à entériner l'UEM et l'euro dans leurs traités d'adhésion.</p> |

| TED                                                                                                                                                                                                                                                                                                                                                                                                                                                                        |
|----------------------------------------------------------------------------------------------------------------------------------------------------------------------------------------------------------------------------------------------------------------------------------------------------------------------------------------------------------------------------------------------------------------------------------------------------------------------------|
| <p><b>Source:</b> Cette aspiration à trouver des hommes ou des femmes providentiels en ces temps de mondialisation vient de trois facteurs.</p> <p><b>ABS<sub>en</sub>:</b> Le monde de la mondialisation.</p> <p><b>SP<sub>L,en</sub>:</b> Cette aspiration à trouver des hommes ou des femmes provient de trois facteurs de mondialisation.</p> <p><b>Gold:</b> Cette tendance vers des hommes et femmes providentiels en ce temps mondialisé vient de trois causes.</p> |
| <p><b>Source:</b> Dans un premier temps, il s'agit de la complexité et de la vulnérabilité de notre monde.</p> <p><b>ABS<sub>en</sub>:</b> Un regard sur l'avenir du monde</p> <p><b>SP<sub>L,en</sub>:</b> Premièrement, nous parlons de la complexité et de la vulnérabilité du monde.</p> <p><b>Gold:</b> Premièrement, la complexité et la vulnérabilité du monde.</p>                                                                                                 |

| MOSS News                                                                                                                                                                                                                                                                                                                                                                                                                                                                                                                                                                                                                                                                                                                                                                                                                                       |
|-------------------------------------------------------------------------------------------------------------------------------------------------------------------------------------------------------------------------------------------------------------------------------------------------------------------------------------------------------------------------------------------------------------------------------------------------------------------------------------------------------------------------------------------------------------------------------------------------------------------------------------------------------------------------------------------------------------------------------------------------------------------------------------------------------------------------------------------------|
| <p><b>Source:</b> Pourtant, pour la plupart, nous ne voyons pas les choses ainsi.</p> <p><b>ABS<sub>en</sub>:</b> N'y voyez pas les choses qui ne voient pas les choses.</p> <p><b>SP<sub>L,en</sub>:</b> Pourtant, nous ne voyons pas encore les choses.</p> <p><b>Gold:</b> Cependant, la majorité n'est pas du même avis.</p>                                                                                                                                                                                                                                                                                                                                                                                                                                                                                                                |
| <p><b>Source:</b> La plupart des gens chercheront toujours instinctivement de « grands hommes » pour figures historiques, les hommes (et les femmes) qui semblent forger les événements grâce à leur vision politique, leur charisme personnel et la force de leurs positions morales.</p> <p><b>ABS<sub>en</sub>:</b> Les hommes sont à la recherche de chiffres historiques.</p> <p><b>SP<sub>L,en</sub>:</b> La plupart des gens vont toujours chercher instinctivement les hommes et les femmes qui sont dépistés par leur vision politique, leur charisme personnel et la force de leur moral.</p> <p><b>Gold:</b> La population tend à se rattacher à de grands hommes politique, à des personnes qui utilisent leur personnalité, leurs avis pour modifier l'histoire.</p>                                                               |
| <p><b>Source:</b> Par la simple force de leur conviction et de leur personnalité, de telles figures, croyons-nous, peuvent faire avancer les choses, tout en apportant une lueur d'espoir dans un univers autrement détaché et impersonnel. Au Moyen-Orient, tout le monde attend l'arrivée d'un nouvel Anouar Sadat dans le monde arabe.</p> <p><b>ABS:</b> Un regard sur l'avenir de notre pays.</p> <p><b>SP<sub>L,en</sub>:</b> Par leur seule conviction et personnalité, nous croyons que de telles figures pourraient faire avancer les choses, et apporter une lueur d'espoir dans un univers détaché et impersonnel.</p> <p><b>Gold:</b> Par leur seule conviction et personnalité, nous croyons que de telles figures pourraient faire avancer les choses, et apporter une lueur d'espoir dans un univers détaché et impersonnel.</p> |
